# Supplementary material for: Fragment length profiles of cancer mutations enhance detection of circulating tumor DNA in patients with early-stage hepatocellular carcinoma
Source: Springer Nature journal article supplement (doi:10.1186/s12885-023-10681-0), 2023-03-13
Supplement: MOESM2 [file 24617952]

**Table S1A: Clinical characteristics of patients and healthy controls in the discovery cohort.**

|    | <b>CODE</b> | <b>Type</b> | <b>Cohort</b> | <b>paired<br/>WBC</b> | <b>Age</b> | <b>Gender</b> | <b>Stage</b> | <b>Pathology</b> | <b>Tumor<br/>volume</b> | <b>Tumor location</b>  | <b>High risk</b> |
|----|-------------|-------------|---------------|-----------------------|------------|---------------|--------------|------------------|-------------------------|------------------------|------------------|
| 1  | LBH001      | Cancer      | Discovery     | yes                   | 41         | M             | II           | HCC              | 4 x 4 x 4,5<br>cm       | Seg VI                 | HBV              |
| 2  | LBH002      | Cancer      | Discovery     | yes                   | 87         | M             | I            | Carcinoma        | 2,7 x 4,3 cm            | Seg IV                 | No               |
| 3  | LBH003      | Cancer      | Discovery     | yes                   | 38         | M             | NA           | NA               | NA                      | NA                     | HBV              |
| 4  | LBH004      | Cancer      | Discovery     | yes                   | 36         | M             | I            | HCC              | 3,5 x 3 x 3<br>cm       | Seg III                | HBV              |
| 5  | LBH005      | Cancer      | Discovery     | yes                   | 57         | M             | NA           | HCC              | NA                      | NA                     | HBV              |
| 6  | LBH006      | Cancer      | Discovery     | yes                   | 51         | M             | II           | HCC              | 3,2 x 3,7 cm            | Seg V                  | HCV              |
| 7  | LBH007      | Cancer      | Discovery     | yes                   | 58         | F             | NA           | HCC              | 9,6 x 10,1<br>cm        | NA                     | NA               |
| 8  | LBH008      | Cancer      | Discovery     | yes                   | 73         | M             | I            | HCC              | 13 x 15 x 9<br>cm       | Seg VI-VII             | HBV              |
| 9  | LBH009      | Cancer      | Discovery     | yes                   | 52         | M             | NA           | HCC              | 3,5 x 3 x 3<br>cm       | Seg III                | HBV              |
| 10 | LBH010      | Cancer      | Discovery     | yes                   | 69         | M             | NA           | HCC              | 2,7 x 3,6 cm            | Seg V                  | No               |
| 11 | LBH011      | Cancer      | Discovery     | yes                   | 50         | M             | I            | HCC              | 9 x 8 x 5 cm            | Seg II-III             | HBV              |
| 12 | LBH012      | Cancer      | Discovery     | yes                   | 61         | M             | NA           | HCC              | 7,5 x 5,5 x<br>6,5 cm   | Right lobe of<br>liver | HBV              |
| 13 | LBH013      | Cancer      | Discovery     | yes                   | 69         | M             | NA           | HCC              | 3,2 x 4 x 2,5<br>cm     | Seg VIII               | HCV              |
| 14 | LBH014      | Cancer      | Discovery     | yes                   | 50         | M             | II           | HCC              | 3,5 x 2,5 x<br>2,5 cm   | Segment                | HCV              |
| 15 | LBH015      | Cancer      | Discovery     | yes                   | 68         | M             | II           | HCC              | 3,2 x 4 x 2,5<br>cm     | Posterior<br>segments  | HBV              |
| 16 | LBH016      | Cancer      | Discovery     | yes                   | 50         | M             | I            | HCC              | 3,5 x 2,5 x<br>2,5 cm   | Seg                    | HBV              |
| 17 | LBH017      | Cancer      | Discovery     | yes                   | 68         | M             | I            | HCC              | 93 x 137 x<br>119 cm    | Right liver            | HBV              |

|    |        |        |           |     |    |   |     |           |                       |                        |         |
|----|--------|--------|-----------|-----|----|---|-----|-----------|-----------------------|------------------------|---------|
| 18 | LBH018 | Cancer | Discovery | yes | 51 | M | III | HCC       | 5,8 X 5,4 X<br>6,2 cm | NA                     | No      |
| 19 | LBH019 | Cancer | Discovery | yes | 35 | M | II  | Carcinoma | 2.5 x 2.5 x 2<br>cm   | Seg VI                 | HBV     |
| 20 | LBH020 | Cancer | Discovery | yes | 75 | M | II  | HCC       | 6 x 5 x 5 cm          | Anterior<br>segments   | HBV     |
| 21 | LBH021 | Cancer | Discovery | yes | 64 | M | II  | HCC       | 3,5 x 3 x 3<br>cm     | Seg VIII               | HBV     |
| 22 | LBH022 | Cancer | Discovery | yes | 57 | M | III | HCC       | 7 x 6 x 6 cm          | Right lobe of<br>liver | HBV     |
| 23 | LBH023 | Cancer | Discovery | yes | 56 | M | III | HCC       | 12 x 8 x 8<br>cm      | Right lobe of<br>liver | HBV     |
| 24 | LBH024 | Cancer | Discovery | yes | 71 | F | NA  | Carcinoma | 4,5 x 4 x 3<br>cm     | Left lobe of liver     | HBV     |
| 25 | LBH025 | Cancer | Discovery | yes | 64 | M | II  | HCC       | 2cm                   | NA                     | HBV     |
| 26 | LBH026 | Cancer | Discovery | yes | 63 | M | II  | HCC       | 8 x 5,5 x 7<br>cm     | Left lobe of liver     | No      |
| 27 | LBH027 | Cancer | Discovery | yes | 28 | M | II  | HCC       | 2,5 x 2 x 1,5<br>cm   | Left lobe of liver     | No      |
| 28 | LBH028 | Cancer | Discovery | yes | 52 | M | II  | HCC       | 2,5 x 2,2 x<br>1,5 cm | Seg IV                 | HBV/HCV |
| 29 | LBH029 | Cancer | Discovery | yes | 55 | M | II  | HCC       | 4 x 3,8 x 3,5<br>cm   | Left liver             | HBV     |
| 30 | LBH030 | Cancer | Discovery | yes | 67 | M | II  | HCC       | NA                    | NA                     | HBV     |
| 31 | LBH031 | Cancer | Discovery | yes | 70 | M | II  | HCC       | 4,3 x 3,8 x 3<br>cm   | Seg V                  | HBV     |
| 32 | LBH032 | Cancer | Discovery | yes | 56 | M | II  | HCC       | 3,5 x 3,2 x<br>2,8 cm | Anterior<br>segments   | HBV     |
| 33 | LBH033 | Cancer | Discovery | yes | 50 | M | II  | HCC       | 10,5 x 10 x 8<br>cm   | Seg VI                 | HBV     |
| 34 | LBH034 | Cancer | Discovery | yes | 68 | F | II  | HCC       | 4,2 x 3,1 x<br>3,5 cm | Seg VI                 | HBV     |

|    |        |        |           |     |    |   |    |           |                    |                    |     |
|----|--------|--------|-----------|-----|----|---|----|-----------|--------------------|--------------------|-----|
| 35 | LBH035 | Cancer | Discovery | yes | 59 | M | II | HCC       | 4,6 x 3,2 x 3,5 cm | Left liver         | HBV |
| 36 | LBH036 | Cancer | Discovery | yes | 58 | M | II | HCC       | 6,5 x 6 x 5 cm     | Left liver         | HBV |
| 37 | LBH037 | Cancer | Discovery | yes | 60 | M | I  | Carcinoma | 3,4 x 3 x 3 cm     | Seg V              | HBV |
| 38 | LBH038 | Cancer | Discovery | yes | 64 | F | II | HCC       | 5,5 x 4 x 3 cm     | Posterior segments | HBV |
| 39 | LBH039 | Cancer | Discovery | yes | 74 | M | I  | Carcinoma | 9,8 x 9,5 x 7 cm   | Hepatoblastoma     | HBV |
| 40 | LBH040 | Cancer | Discovery | yes | 59 | M | II | HCC       | 4 x 3,5 x 2,6 cm   | Seg VI             | HBV |
| 41 | LBH041 | Cancer | Discovery | yes | 53 | M | II | HCC       | 4,1 x 4,6 cm       | Seg V-VI           | HBV |
| 42 | LBH042 | Cancer | Discovery | yes | 64 | F | NA | HCC       | 9 x 9 x 7 cm       | Right liver        | HBV |
| 43 | LBH043 | Cancer | Discovery | yes | 32 | M | II | HCC       | 9,5 x 7,5 x 7 cm   | Left liver         | HBV |
| 44 | LBH044 | Cancer | Discovery | yes | 24 | F | II | HCC       | 9 x 7 x 6 cm       | Seg VI             | No  |
| 45 | LBH045 | Cancer | Discovery | yes | 36 | M | II | HCC       | 4 x 3 x 3 cm       | Seg VIII           | HBV |
| 46 | LBH046 | Cancer | Discovery | yes | 77 | M | II | HCC       | 9,5 x 6,5 x 5 cm   | Right liver        | HBV |
| 47 | LBH047 | Cancer | Discovery | yes | 64 | M | NA | HCC       | 9 x 6 x 5 cm       | Right liver        | HBV |
| 48 | LBH048 | Cancer | Discovery | yes | 47 | M | NA | HCC       | 7 x 6 x 4,5 cm     | Posterior segments | HBV |
| 49 | LBH049 | Cancer | Discovery | yes | 53 | M | II | HCC       | 2 x 1,6 x 1,4 cm   | Right liver        | HBV |
| 50 | LBH050 | Cancer | Discovery | yes | 59 | M | II | HCC       | 4,5 x 3,2 x 2,8 cm | Seg IV             | HBV |
| 51 | LBH051 | Cancer | Discovery | yes | 71 | F | NA | HCC       | NA                 | NA                 | HBV |
| 52 | LBH052 | Cancer | Discovery | yes | 55 | M | II | HCC       | 7,3cm              | Left lobe of liver | HBV |
| 53 | LBH054 | Cancer | Discovery | yes | 58 | M | I  | HCC       | 4 x 3 x 3.5 cm     | Seg IV             | HBV |

|    |         |                     |           |     |    |   |    |     |                   |                       |     |
|----|---------|---------------------|-----------|-----|----|---|----|-----|-------------------|-----------------------|-----|
| 54 | LBH055  | Cancer              | Discovery | yes | 36 | M | NA | HCC | 2.5 x 2 x 2<br>cm | Posterior<br>segments | HBV |
| 55 | LBH056  | Cancer              | Discovery | yes | 61 | F | NA | NA  | NA                | NA                    | NA  |
| 56 | LBHC001 | Healthy-<br>control | Discovery | yes | 43 | M | NA | NA  | NA                | NA                    | NA  |
| 57 | LBHC003 | Healthy-<br>control | Discovery | yes | 27 | M | NA | NA  | NA                | NA                    | NA  |
| 58 | LBHC005 | Healthy-<br>control | Discovery | yes | 28 | M | NA | NA  | NA                | NA                    | NA  |
| 59 | LBHC006 | Healthy-<br>control | Discovery | yes | 35 | M | NA | NA  | NA                | NA                    | NA  |
| 60 | LBHC011 | Healthy-<br>control | Discovery | yes | 34 | F | NA | NA  | NA                | NA                    | NA  |
| 61 | LBHC013 | Healthy-<br>control | Discovery | yes | 61 | M | NA | NA  | NA                | NA                    | NA  |
| 62 | LBHC015 | Healthy-<br>control | Discovery | yes | 48 | M | NA | NA  | NA                | NA                    | NA  |
| 63 | LBHC017 | Healthy-<br>control | Discovery | yes | 44 | F | NA | NA  | NA                | NA                    | NA  |
| 64 | LBHC023 | Healthy-<br>control | Discovery | yes | 61 | M | NA | NA  | NA                | NA                    | NA  |
| 65 | LBHC024 | Healthy-<br>control | Discovery | yes | 37 | F | NA | NA  | NA                | NA                    | NA  |
| 66 | LBHC029 | Healthy-<br>control | Discovery | yes | 50 | F | NA | NA  | NA                | NA                    | NA  |
| 67 | LBHC032 | Healthy-<br>control | Discovery | yes | 69 | M | NA | NA  | NA                | NA                    | NA  |
| 68 | LBHC033 | Healthy-<br>control | Discovery | yes | 62 | F | NA | NA  | NA                | NA                    | NA  |
| 69 | LBHC034 | Healthy-<br>control | Discovery | yes | 43 | M | NA | NA  | NA                | NA                    | NA  |

|    |         |                 |           |     |    |   |    |    |    |    |    |
|----|---------|-----------------|-----------|-----|----|---|----|----|----|----|----|
| 70 | LBHC035 | Healthy-control | Discovery | yes | 48 | F | NA | NA | NA | NA | NA |
| 71 | LBHC036 | Healthy-control | Discovery | yes | 31 | F | NA | NA | NA | NA | NA |
| 72 | LBHC039 | Healthy-control | Discovery | yes | 42 | F | NA | NA | NA | NA | NA |
| 73 | LBHC040 | Healthy-control | Discovery | yes | 40 | F | NA | NA | NA | NA | NA |
| 74 | LBHC043 | Healthy-control | Discovery | yes | 36 | M | NA | NA | NA | NA | NA |
| 75 | LBHC055 | Healthy-control | Discovery | yes | 28 | F | NA | NA | NA | NA | NA |
| 76 | LBHC059 | Healthy-control | Discovery | yes | 81 | M | NA | NA | NA | NA | NA |
| 77 | LBHC061 | Healthy-control | Discovery | yes | 40 | M | NA | NA | NA | NA | NA |
| 78 | LBHC065 | Healthy-control | Discovery | yes | 61 | F | NA | NA | NA | NA | NA |
| 79 | LBHC067 | Healthy-control | Discovery | yes | 37 | M | NA | NA | NA | NA | NA |
| 80 | LBHC075 | Healthy-control | Discovery | yes | 37 | F | NA | NA | NA | NA | NA |
| 81 | LBHC078 | Healthy-control | Discovery | yes | 41 | F | NA | NA | NA | NA | NA |
| 82 | LBHC079 | Healthy-control | Discovery | yes | 46 | F | NA | NA | NA | NA | NA |
| 83 | LBHC080 | Healthy-control | Discovery | yes | 70 | M | NA | NA | NA | NA | NA |
| 84 | LBHC082 | Healthy-control | Discovery | yes | 49 | F | NA | NA | NA | NA | NA |
| 85 | LBHC087 | Healthy-control | Discovery | yes | 55 | M | NA | NA | NA | NA | NA |

|     |         |                 |           |     |    |   |    |    |    |    |    |
|-----|---------|-----------------|-----------|-----|----|---|----|----|----|----|----|
| 86  | LBHC088 | Healthy-control | Discovery | yes | 37 | F | NA | NA | NA | NA | NA |
| 87  | LBHC094 | Healthy-control | Discovery | yes | 25 | F | NA | NA | NA | NA | NA |
| 88  | LBHC095 | Healthy-control | Discovery | yes | 48 | F | NA | NA | NA | NA | NA |
| 89  | LBHC097 | Healthy-control | Discovery | yes | 46 | F | NA | NA | NA | NA | NA |
| 90  | LBHC099 | Healthy-control | Discovery | yes | 47 | F | NA | NA | NA | NA | NA |
| 91  | LBHC102 | Healthy-control | Discovery | yes | 39 | M | NA | NA | NA | NA | NA |
| 92  | LBHC103 | Healthy-control | Discovery | yes | 67 | F | NA | NA | NA | NA | NA |
| 93  | LBHC104 | Healthy-control | Discovery | yes | 52 | M | NA | NA | NA | NA | NA |
| 94  | LBHC106 | Healthy-control | Discovery | yes | 47 | M | NA | NA | NA | NA | NA |
| 95  | LBHC002 | Healthy-control | Discovery | yes | 29 | M | NA | NA | NA | NA | NA |
| 96  | LBHC009 | Healthy-control | Discovery | yes | 34 | F | NA | NA | NA | NA | NA |
| 97  | LBHC010 | Healthy-control | Discovery | yes | 38 | F | NA | NA | NA | NA | NA |
| 98  | LBHC014 | Healthy-control | Discovery | yes | 60 | F | NA | NA | NA | NA | NA |
| 99  | LBHC018 | Healthy-control | Discovery | yes | 61 | F | NA | NA | NA | NA | NA |
| 100 | LBHC019 | Healthy-control | Discovery | yes | 41 | M | NA | NA | NA | NA | NA |
| 101 | LBHC020 | Healthy-control | Discovery | yes | 37 | M | NA | NA | NA | NA | NA |

|     |         |                 |           |     |    |   |    |    |    |    |    |
|-----|---------|-----------------|-----------|-----|----|---|----|----|----|----|----|
| 102 | LBHC026 | Healthy-control | Discovery | yes | 40 | F | NA | NA | NA | NA | NA |
| 103 | LBHC038 | Healthy-control | Discovery | yes | 30 | F | NA | NA | NA | NA | NA |
| 104 | LBHC051 | Healthy-control | Discovery | yes | 39 | F | NA | NA | NA | NA | NA |
| 105 | LBHC056 | Healthy-control | Discovery | yes | 35 | F | NA | NA | NA | NA | NA |
| 106 | LBHC064 | Healthy-control | Discovery | yes | 35 | F | NA | NA | NA | NA | NA |
| 107 | LBHC072 | Healthy-control | Discovery | yes | 40 | M | NA | NA | NA | NA | NA |
| 108 | LBHC089 | Healthy-control | Discovery | yes | 48 | F | NA | NA | NA | NA | NA |
| 109 | LBHC098 | Healthy-control | Discovery | yes | 44 | F | NA | NA | NA | NA | NA |
| 110 | LBHC107 | Healthy-control | Discovery | yes | 43 | M | NA | NA | NA | NA | NA |

**Table S1B: Clinical characteristics of patients and healthy controls in the validation cohort.**

|    | <b>LABCODE</b> | <b>Type</b>     | <b>Cohort</b> | <b>Age</b> | <b>Gender</b> | <b>Imaging Diagnosis</b> | <b>Tumor volume</b> | <b>Tumor location</b> | <b>High risk</b> |
|----|----------------|-----------------|---------------|------------|---------------|--------------------------|---------------------|-----------------------|------------------|
| 1  | LBHC004        | Healthy-control | Validation    | 35         | F             | NA                       | NA                  | NA                    | NA               |
| 2  | LBHC016        | Healthy-control | Validation    | 49         | F             | NA                       | NA                  | NA                    | NA               |
| 3  | LBHC021        | Healthy-control | Validation    | 47         | F             | NA                       | NA                  | NA                    | NA               |
| 4  | LBHC022        | Healthy-control | Validation    | 17         | F             | NA                       | NA                  | NA                    | NA               |
| 5  | LBHC025        | Healthy-control | Validation    | 75         | F             | NA                       | NA                  | NA                    | NA               |
| 6  | LBHC027        | Healthy-control | Validation    | 30         | M             | NA                       | NA                  | NA                    | NA               |
| 7  | LBHC030        | Healthy-control | Validation    | 42         | F             | NA                       | NA                  | NA                    | NA               |
| 8  | LBHC045        | Healthy-control | Validation    | 54         | M             | NA                       | NA                  | NA                    | NA               |
| 9  | LBHC048        | Healthy-control | Validation    | 59         | M             | NA                       | NA                  | NA                    | NA               |
| 10 | LBHC074        | Healthy-control | Validation    | 28         | M             | NA                       | NA                  | NA                    | NA               |
| 11 | LBHC105        | Healthy-control | Validation    | 51         | M             | NA                       | NA                  | NA                    | NA               |
| 12 | LBHC007        | Healthy-control | Validation    | 27         | M             | NA                       | NA                  | NA                    | NA               |
| 13 | LBHC008        | Healthy-control | Validation    | 48         | M             | NA                       | NA                  | NA                    | NA               |
| 14 | LBHC012        | Healthy-control | Validation    | 35         | F             | NA                       | NA                  | NA                    | NA               |
| 15 | LBHC028        | Healthy-control | Validation    | 31         | F             | NA                       | NA                  | NA                    | NA               |
| 16 | LBHC031        | Healthy-control | Validation    | 53         | M             | NA                       | NA                  | NA                    | NA               |
| 17 | LBHC041        | Healthy-control | Validation    | 39         | F             | NA                       | NA                  | NA                    | NA               |
| 18 | LBHC047        | Healthy-control | Validation    | 54         | M             | NA                       | NA                  | NA                    | NA               |
| 19 | LBHC057        | Healthy-control | Validation    | 35         | M             | NA                       | NA                  | NA                    | NA               |
| 20 | LBHC077        | Healthy-control | Validation    | 38         | F             | NA                       | NA                  | NA                    | NA               |
| 21 | LBHC037        | Healthy-control | Validation    | 37         | F             | NA                       | NA                  | NA                    | NA               |
| 22 | LBHC042        | Healthy-control | Validation    | 28         | F             | NA                       | NA                  | NA                    | NA               |
| 23 | LBHC044        | Healthy-control | Validation    | 45         | F             | NA                       | NA                  | NA                    | NA               |
| 24 | LBHC046        | Healthy-control | Validation    | 48         | F             | NA                       | NA                  | NA                    | NA               |
| 25 | LBHC049        | Healthy-control | Validation    | 42         | M             | NA                       | NA                  | NA                    | NA               |
| 26 | LBHC050        | Healthy-control | Validation    | 47         | F             | NA                       | NA                  | NA                    | NA               |
| 27 | LBHC052        | Healthy-control | Validation    | 33         | F             | NA                       | NA                  | NA                    | NA               |
| 28 | LBHC053        | Healthy-control | Validation    | 61         | M             | NA                       | NA                  | NA                    | NA               |



|    |         |                 |            |    |   |                    |    |    |     |
|----|---------|-----------------|------------|----|---|--------------------|----|----|-----|
| 29 | LBHC054 | Healthy-control | Validation | 32 | F | NA                 | NA | NA | NA  |
| 30 | LBHC058 | Healthy-control | Validation | 43 | M | NA                 | NA | NA | NA  |
| 31 | LBHC060 | Healthy-control | Validation | 45 | F | NA                 | NA | NA | NA  |
| 32 | LBHC062 | Healthy-control | Validation | 55 | F | NA                 | NA | NA | NA  |
| 33 | LBHC063 | Healthy-control | Validation | 56 | M | NA                 | NA | NA | NA  |
| 34 | LBHC066 | Healthy-control | Validation | 46 | F | NA                 | NA | NA | NA  |
| 35 | LBHC068 | Healthy-control | Validation | 31 | F | NA                 | NA | NA | NA  |
| 36 | LBHC069 | Healthy-control | Validation | 43 | M | NA                 | NA | NA | NA  |
| 37 | LBHC070 | Healthy-control | Validation | 26 | M | NA                 | NA | NA | NA  |
| 38 | LBHC071 | Healthy-control | Validation | 35 | F | NA                 | NA | NA | NA  |
| 39 | LBHC073 | Healthy-control | Validation | 33 | F | NA                 | NA | NA | NA  |
| 40 | LBHC076 | Healthy-control | Validation | 48 | M | NA                 | NA | NA | NA  |
| 41 | LBHC081 | Healthy-control | Validation | 47 | F | NA                 | NA | NA | NA  |
| 42 | LBHC083 | Healthy-control | Validation | 63 | F | NA                 | NA | NA | NA  |
| 43 | LBHC084 | Healthy-control | Validation | 64 | M | NA                 | NA | NA | NA  |
| 44 | LBHC085 | Healthy-control | Validation | 33 | F | NA                 | NA | NA | NA  |
| 45 | LBHC086 | Healthy-control | Validation | 39 | M | NA                 | NA | NA | NA  |
| 46 | LBHC090 | Healthy-control | Validation | 40 | F | NA                 | NA | NA | NA  |
| 47 | LBHC091 | Healthy-control | Validation | 53 | M | NA                 | NA | NA | NA  |
| 48 | LBHC092 | Healthy-control | Validation | 67 | M | NA                 | NA | NA | NA  |
| 49 | LBHC093 | Healthy-control | Validation | 58 | F | NA                 | NA | NA | NA  |
| 50 | LBHC096 | Healthy-control | Validation | 38 | F | NA                 | NA | NA | NA  |
| 51 | LBHC100 | Healthy-control | Validation | 29 | M | NA                 | NA | NA | NA  |
| 52 | LBHC101 | Healthy-control | Validation | 47 | M | NA                 | NA | NA | NA  |
| 53 | LBHC108 | Healthy-control | Validation | 31 | M | NA                 | NA | NA | NA  |
| 54 | LBM005  | Cancer          | Validation | 58 | M | Non-metastatic HCC | NA | NA | HCV |
| 55 | LBM006  | Cancer          | Validation | 73 | M | Non-metastatic HCC | NA | NA | HCV |
| 56 | LBM010  | Cancer          | Validation | 47 | M | Non-metastatic HCC | NA | NA | HBV |
| 57 | LBM016  | Cancer          | Validation | 33 | M | Non-metastatic HCC | NA | NA | HBV |
| 58 | LBM018  | Cancer          | Validation | 63 | M | Non-metastatic HCC | NA | NA | HBV |
| 59 | LBM022  | Cancer          | Validation | 69 | M | Non-metastatic HCC | NA | NA | HCV |

|    |        |        |            |    |   |                    |    |    |     |
|----|--------|--------|------------|----|---|--------------------|----|----|-----|
| 60 | LBM023 | Cancer | Validation | 66 | M | Non-metastatic HCC | NA | NA | HBV |
| 61 | LBM025 | Cancer | Validation | 69 | F | Non-metastatic HCC | NA | NA | HBV |
| 62 | LBM028 | Cancer | Validation | 77 | F | Non-metastatic HCC | NA | NA | HBV |
| 63 | LBM031 | Cancer | Validation | 52 | M | Non-metastatic HCC | NA | NA | HBV |
| 64 | LBM033 | Cancer | Validation | 56 | M | Non-metastatic HCC | NA | NA | HBV |
| 65 | LBM036 | Cancer | Validation | 62 | F | Non-metastatic HCC | NA | NA | HCV |
| 66 | LBM037 | Cancer | Validation | 48 | M | Non-metastatic HCC | NA | NA | HBV |
| 67 | LBM038 | Cancer | Validation | 73 | M | Non-metastatic HCC | NA | NA | NA  |
| 68 | LBM040 | Cancer | Validation | 60 | F | Non-metastatic HCC | NA | NA | HBV |
| 69 | LBM043 | Cancer | Validation | 65 | M | Non-metastatic HCC | NA | NA | HCV |
| 70 | LBM053 | Cancer | Validation | 69 | M | Non-metastatic HCC | NA | NA | HBV |
| 71 | LBM054 | Cancer | Validation | 55 | M | Non-metastatic HCC | NA | NA | HCV |
| 72 | LBM056 | Cancer | Validation | 64 | F | Non-metastatic HCC | NA | NA | HCV |
| 73 | LBM065 | Cancer | Validation | 66 | M | Non-metastatic HCC | NA | NA | HCV |
| 74 | LBM070 | Cancer | Validation | 71 | M | Non-metastatic HCC | NA | NA | HBV |
| 75 | LBM001 | Cancer | Validation | 72 | F | Non-metastatic HCC | NA | NA | No  |
| 76 | LBM002 | Cancer | Validation | 51 | M | Non-metastatic HCC | NA | NA | No  |
| 77 | LBM003 | Cancer | Validation | 34 | M | Non-metastatic HCC | NA | NA | HBV |
| 78 | LBM004 | Cancer | Validation | 63 | F | Non-metastatic HCC | NA | NA | HBV |
| 79 | LBM007 | Cancer | Validation | 61 | F | Non-metastatic HCC | NA | NA | HBV |
| 80 | LBM009 | Cancer | Validation | 71 | M | Non-metastatic HCC | NA | NA | HBV |
| 81 | LBM011 | Cancer | Validation | 56 | F | Non-metastatic HCC | NA | NA | HBV |
| 82 | LBM012 | Cancer | Validation | 52 | M | Non-metastatic HCC | NA | NA | HBV |
| 83 | LBM013 | Cancer | Validation | 57 | M | Non-metastatic HCC | NA | NA | HBV |
| 84 | LBM014 | Cancer | Validation | 56 | M | Non-metastatic HCC | NA | NA | No  |
| 85 | LBM015 | Cancer | Validation | 50 | M | Non-metastatic HCC | NA | NA | HBV |
| 86 | LBM017 | Cancer | Validation | 57 | M | Non-metastatic HCC | NA | NA | No  |
| 87 | LBM019 | Cancer | Validation | 60 | M | Non-metastatic HCC | NA | NA | HBV |
| 88 | LBM021 | Cancer | Validation | 61 | F | Non-metastatic HCC | NA | NA | HBV |
| 89 | LBM024 | Cancer | Validation | 65 | M | Non-metastatic HCC | NA | NA | NA  |
| 90 | LBM026 | Cancer | Validation | 64 | F | Non-metastatic HCC | NA | NA | HBV |

|     |        |        |            |    |   |                    |    |    |         |
|-----|--------|--------|------------|----|---|--------------------|----|----|---------|
| 91  | LBM027 | Cancer | Validation | 58 | M | Non-metastatic HCC | NA | NA | No      |
| 92  | LBM029 | Cancer | Validation | 51 | M | Non-metastatic HCC | NA | NA | HBV     |
| 93  | LBM030 | Cancer | Validation | 67 | F | Non-metastatic HCC | NA | NA | HBV     |
| 94  | LBM032 | Cancer | Validation | 51 | M | Non-metastatic HCC | NA | NA | HBV     |
| 95  | LBM034 | Cancer | Validation | 59 | F | Non-metastatic HCC | NA | NA | No      |
| 96  | LBM035 | Cancer | Validation | 48 | M | Non-metastatic HCC | NA | NA | HBV     |
| 97  | LBM039 | Cancer | Validation | 68 | M | Non-metastatic HCC | NA | NA | HBV     |
| 98  | LBM042 | Cancer | Validation | 46 | M | Non-metastatic HCC | NA | NA | NA      |
| 99  | LBM044 | Cancer | Validation | 53 | M | Non-metastatic HCC | NA | NA | NA      |
| 100 | LBM045 | Cancer | Validation | 42 | M | Non-metastatic HCC | NA | NA | HBV     |
| 101 | LBM046 | Cancer | Validation | 57 | M | Non-metastatic HCC | NA | NA | HBV/HCV |
| 102 | LBM055 | Cancer | Validation | 72 | F | Non-metastatic HCC | NA | NA | No      |
| 103 | LBM057 | Cancer | Validation | 50 | M | Non-metastatic HCC | NA | NA | HBV     |
| 104 | LBM058 | Cancer | Validation | 72 | F | Non-metastatic HCC | NA | NA | HCV     |
| 105 | LBM069 | Cancer | Validation | 63 | M | Non-metastatic HCC | NA | NA | HCV     |
| 106 | LBM073 | Cancer | Validation | 73 | F | Non-metastatic HCC | NA | NA | HBV     |
| 107 | LBM083 | Cancer | Validation | 55 | M | Non-metastatic HCC | NA | NA | HBV     |

**Table S2: Gene panel for targeted sequencing**

| <b>Target</b>      | <b>Target region size (bp)</b> | <b>Chromosome</b> | <b>Start</b> | <b>Stop</b> | <b>Strand</b> |
|--------------------|--------------------------------|-------------------|--------------|-------------|---------------|
| APC                | 8931                           | 5                 | 112043415    | 112179823   | +             |
| ARID1A             | 6858                           | 1                 | 27022895     | 27107247    | +             |
| AXIN1              | 2886                           | 16                | 338122       | 402434      | -             |
| BRAF               | 10204                          | 7                 | 140419134    | 140624305   | -             |
| CDKN2A             | 2627                           | 9                 | 21968228     | 21994357    | -             |
| CTNNB1             | 2346                           | 3                 | 41265560     | 41280833    | +             |
| EGFR               | 4952                           | 7                 | 55086971     | 55273310    | +             |
| KRAS               | 1273                           | 12                | 25362445     | 25398329    | -             |
| PIK3CA             | 3207                           | 3                 | 178916614    | 178952152   | +             |
| PTEN               | 1212                           | 10                | 89624226     | 89725229    | +             |
| STK11              | 4617                           | 19                | 1206913      | 1228081     | +             |
| TP53               | 1689                           | 17                | 7572927      | 7579912     | -             |
| TERT<br>(promoter) | 300                            | 5                 | 1253282      | 1295184     | -             |

**Table S3 Frequencies of mutations of difference sources in 55 HCC patients**

| Gene   | LB_unique         |            |               |            | TDM             |            |               |            | LB-shared-WBC   |            |               |            | VUS               |            |               |            |
|--------|-------------------|------------|---------------|------------|-----------------|------------|---------------|------------|-----------------|------------|---------------|------------|-------------------|------------|---------------|------------|
|        | Mutation (N=3620) |            | Sample (N=55) |            | Mutation (N=30) |            | Sample (N=55) |            | Mutation (N=66) |            | Sample (N=55) |            | Mutation (N=3596) |            | Sample (N=55) |            |
|        | Number            | Percentage | Number        | Percentage | Number          | Percentage | Number        | Percentage | Number          | Percentage | Number        | Percentage | Number            | Percentage | Number        | Percentage |
| APC    | 592               | 16%        | 53            | 96%        | 2               | 7%         | 1             | 2%         | 7               | 11%        | 32            | 58%        | 591               | 16%        | 53            | 96%        |
| ARID1A | 590               | 16%        | 54            | 98%        | 3               | 10%        | 3             | 5%         | 7               | 11%        | 13            | 24%        | 588               | 16%        | 54            | 98%        |
| AXIN1  | 259               | 7%         | 54            | 98%        | 3               | 10%        | 3             | 5%         | 5               | 8%         | 17            | 31%        | 257               | 7%         | 54            | 98%        |
| BRAF   | 621               | 17%        | 55            | 100%       | 3               | 10%        | 3             | 5%         | 6               | 9%         | 27            | 49%        | 619               | 17%        | 55            | 100%       |
| CDKN2A | 139               | 4%         | 50            | 91%        | 0               | 0%         | 0             | 0%         | 3               | 5%         | 27            | 49%        | 139               | 4%         | 50            | 91%        |
| CTNNB1 | 99                | 3%         | 30            | 55%        | 4               | 13%        | 4             | 7%         | 1               | 2%         | 7             | 13%        | 95                | 3%         | 28            | 51%        |
| EGFR   | 436               | 12%        | 49            | 89%        | 3               | 10%        | 3             | 5%         | 13              | 20%        | 45            | 82%        | 433               | 12%        | 49            | 89%        |
| KRAS   | 45                | 1%         | 22            | 40%        | 0               | 0%         | 0             | 0%         | 3               | 5%         | 12            | 22%        | 45                | 1%         | 22            | 40%        |
| PIK3CA | 162               | 4%         | 39            | 71%        | 0               | 0%         | 0             | 0%         | 0               | 0%         | 0             | 0%         | 162               | 5%         | 39            | 71%        |
| PTEN   | 93                | 3%         | 33            | 60%        | 2               | 7%         | 2             | 4%         | 1               | 2%         | 1             | 2%         | 91                | 3%         | 32            | 58%        |
| STK11  | 428               | 12%        | 53            | 96%        | 2               | 7%         | 2             | 4%         | 16              | 24%        | 32            | 58%        | 426               | 12%        | 53            | 96%        |
| TERT   | 22                | 1%         | 25            | 45%        | 1               | 3%         | 4             | 7%         | 1               | 2%         | 11            | 20%        | 21                | 1%         | 23            | 42%        |
| TP53   | 134               | 4%         | 44            | 80%        | 7               | 23%        | 11            | 20%        | 3               | 5%         | 26            | 47%        | 129               | 4%         | 41            | 75%        |
